# Supplementary material
Source: PubMed Central journal article supplement (PMC10086911)
Supplement: ajtr0015-1744-f7.pdf [file ajtr0015-1744-f7.pdf]

## Depletion of FTO & ALKBH5 causes EMT in ccRCC

**Table S1.** The GpmR sequences of all the genes

| Target     | Sequence          |
|------------|-------------------|
| FTO-1      | CTTTACGCAGCTTGAT  |
| FTO-2      | ACCAGTCACTCATTAA  |
| ALKBH5-1   | AGCAATTGAGGACATC  |
| ALKBH5-2   | GTAAAGTCAAGAGGTT  |
| Neg Ctrl A | AACACGTCTATACGC   |
| GAPDH      | AGATTCAAGTGTGGTGG |

**Table S2.** The PCR primer sequences of all the genes

| Target         | Sequence                   |
|----------------|----------------------------|
| ACTB-forward   | CCAACCGCGAGAAGATGA         |
| ACTB-reverse   | CCAGAGGCGTACAGGGATAG       |
| GAPDH-forward  | CTCTGCTCCTCCTGTTTCGAC      |
| GAPDH-reverse  | ACGACCAAATCGGTTGACTC       |
| ALKBH5-forward | CCTGCTCTGAAACCCAAGC        |
| ALKBH5-reverse | TCCTTGCCATCTCCAGGAT        |
| FTO-forward    | GAAAATCTGGTGGACAGGTCA      |
| FTO-reverse    | CGAGATGAGAGTCACTCCTCACTT   |
| CDKN1A-forward | CGAAGTCAGTTCCTTGTGGAG      |
| CDKN1A-reverse | CATGGGTTCTGACGGACAT        |
| CDKN1B-forward | CCCTAGAGGGCAAGTACGAGT      |
| CDKN1B-reverse | AGTAGAACTCGGGCAAGCTG       |
| BAX-forward    | ATGTTTTCTGACGGCAACTTC      |
| BAX-reverse    | ATCAGTTCGGCACCTTG          |
| P53-forward    | CTTTCCACGACGGTGACA         |
| P53-reverse    | TCCTCCATGGCAGTGACC         |
| CDH1-forward   | AAGGGGTCTGTCATGGAAGG       |
| CDH1-reverse   | GGTGTTACATCATCGTCCG        |
| CDH2-forward   | CCATCATTGCCATCCTGCTC       |
| CDH2-reverse   | GTTTGGCCTGGCGTTCTTTA       |
| SNAI1-forward  | GCTGCAGGACTCTAATCCAGA      |
| SNAI1-reverse  | ATCTCCGAGGTGGGATG          |
| SNAI2-forward  | TGGTTGCTTCAAGGACACAT       |
| SNAI2-reverse  | GTTGCAGTGAGGGCAAGAA        |
| VIM-forward    | GAGAGGAAGCCGAAAACACC       |
| VIM-reverse    | TTGCGTTCAAGGTCAAGACG       |
| PCNA-forward   | TGTCACAGACAAGTAATGTCGATAAA |
| PCNA-reverse   | GAAGTGGTTCATTCATCTCTATGG   |

## Depletion of FTO & ALKBH5 causes EMT in ccRCC

**Table S3.** The antibody information of all the genes

| Specific Antibody    | Dilution          | Manufacturer                            |
|----------------------|-------------------|-----------------------------------------|
| Anti-FTO             | IgG rabbit 1:1250 | Atlas Antibodies, Bromma, Sweden        |
| Anti-ALKBH5          | IgG rabbit 1:250  | Novus Biologicals, Centennial, USA      |
| Anti-VIM             | IgG rabbit 1:1000 | Cell Signaling Technology, Danvers, USA |
| Anti-PCNA            | IgG mouse 1:200   | Santa Cruz Biotechnology, Dallas, USA   |
| Anti-CDH2            | IgG mouse 1:200   | Santa Cruz Biotechnology, Dallas, USA   |
| Anti-SNAI2           | IgG mouse 1:100   | Santa Cruz Biotechnology, Dallas, USA   |
| Anti-CDKN1B          | IgG mouse 1:200   | Santa Cruz Biotechnology, Dallas, USA   |
| Anti-P53             | IgG mouse 1:200   | Santa Cruz Biotechnology, Dallas, USA   |
| Anti-GAPDH           | IgG rabbit 1:1000 | Cell Signaling Technology, Danvers, USA |
| Anti- $\beta$ -Actin | IgG-mouse 1:5000  | Sigma-Aldrich, St. Louis, USA           |
| Secondary Antibody   | Dilution          | manufacturer                            |
| Anti-Rabbit-POD      | IgG-rabbit 1:2000 | Cell Signaling Technology, Danvers, USA |
| Anti-mouse-POD       | IgG-mouse 1:3000  | BIO-RAD Laboratories, Hercules, USA     |

We use Anti-Rabbit-POD as secondary antibody for IgG-rabbit specific antibody, and Anti-mouse-POD as secondary antibody for IgG-mouse specific antibody.
